# Supplementary material
Source: PubMed Central journal article supplement (PMC6822162)
Supplement: jama-322-1977-s004.pdf [file jama-322-1977-s004.pdf]

## Data Sharing Statement

### Data

**Data available:** Yes

**Data types:** Data dictionary, Deidentified participant data

**How to access data:** Proposals for joint use of the study data should be sent to the corresponding author ([S.P.Mooijaart@lumc.nl](mailto:S.P.Mooijaart@lumc.nl)) .

**When available:** With publication

### Supporting Documents

**Document types:** None

### Additional Information

**Who can access the data:** The authors welcome proposals for joint use of the study data after the planned publications of the study data have been completed.

**Types of analyses:** For any purpose, after review and approval from a board of Principle Investigators

**Mechanisms of data availability:** Data will be made available with investigator support, with a signed data access agreement, after approval of a proposal.
